# Supplementary material
Source: ML conference proceedings conference paper supplement (https://openreview.net/forum?id=cK8Vg7KYOo)
Supplement: supplementary_material [file attachment]

# Supplementary Materials: Learning Naturally Aggregated Appearance for Efficient 3D Editing

Ka Leong Cheng<sup>1,2</sup>, Qiuyu Wang<sup>2</sup>, Zifan Shi<sup>1,2</sup>, Kecheng Zheng<sup>2</sup>, Yinghao Xu<sup>2,3</sup>,  
Hao Ouyang<sup>2</sup>, Qifeng Chen<sup>1†</sup>, Yujun Shen<sup>2†</sup>

<sup>1</sup>HKUST <sup>2</sup>Ant Group <sup>3</sup>Stanford

## A. Supplementary Video

To offer a more comprehensive demonstration of our visual results, we have included a supplementary video showcasing three editing cases (scene stylization, instance segmentation, and texture editing) on diverse 3D scenes. Please check “demo.mp4” for details.

## B. Failure Cases and Limitation

Recall that in this paper, we come up with an editing-friendly representation, AGAP, which permits explicit 3D editing with the help of a natural 2D canonical image. In this section, we present some failure cases and discuss the limitation.

Our method supports texture editing by directly painting onto the canonical image. However, such painting might be distorted when the novel viewpoint exhibits occlusions on the edited regions. As shown in Fig. S1, we can easily paint an “AGAP” logo onto the marble pedestal of the fern plant in the canonical image, allowing us to directly obtain the edited NVS from different novel viewpoints through neural rendering. However, the logo appears distorted in the regions that are occluded by the fern plant.

Our pipeline includes a projection offset  $P_o$  to handle moderate levels of occlusion, which implicitly projects and clusters the 3D points to nearby pixels. However, we acknowledge that our method has limitations in handling extensive occlusions in the 3D scenes. Suppose a 3D scene is extremely complex and contains numerous extensive occlusions. Projecting such a scene onto a 2D plane (like a UV map) is possible, but creating a 2D projection that naturally and fully displays the scene for easy interactivity is very challenging and nearly impossible. Hence, such cases are beyond the scope of our current study, and we mainly focus on 3D scenes with moderate levels of occlusion.

Table S1. **Hyperparameters** for training various scenes in different datasets.

| Data Types               | Image Size          | Weight Factor  |                |
|--------------------------|---------------------|----------------|----------------|
|                          |                     | $\lambda_{uv}$ | $\lambda_{tv}$ |
| Forward-facing [3, 7]    | (768, *)            | $10^{-5}$      | $10^{-5}$      |
| Object-centric [4, 6, 8] | (768, *) / (*, 768) | $10^{-1}$      | $10^{-4}$      |
| Panorama [1–3, 11]       | (768, 1536)         | $10^{-1}$      | $10^{-4}$      |

## C. Training Details

Our 3D editing pipeline involves a two-step process: (1) we first train a per-scene reconstruction model using the proposed AGAP representation, which includes an explicit density grid  $\phi_G$ , an explicit canonical image  $\phi_I$ , and an associated projection field  $\phi_P$ ; (2) we can then perform explicit 2D edits on the canonical image  $\phi_I$  for 3D scene editing, including scene stylization, instance segmentation, and texture editing. All experiments, including training on various scenes from different datasets, are conducted and tested on a single RTX A6000 GPU, with specific hyperparameter details outlined in Tab. S1.

**Optimization.** In the first stage, we employ the Adam optimizer [5] to optimize a per-scene model for 60k steps with an initial learning rate of 0.1 for both the explicit 3D density grid  $\phi_G$  and 2D canonical image  $\phi_I$ , and a learning rate of 0.001 for the implicit projection field  $P$  with learnable parameter  $\phi_P$ . The optimization of the entire model involves an objective function comprising three main components: (1) an average  $\mathcal{L}_2$  photometric loss  $\mathcal{L}_{color}$  between the rendered pixel color  $\hat{C}(\mathbf{r})$  and the ground-truth color  $C(\mathbf{r})$ ; (2) a projection regularization  $\mathcal{L}_{uv}$  aimed at minimizing the projection offset  $\Delta \mathbf{p}_{uv}$ ; and (3) a total variation regularization applied to the density grid  $\phi_G$ .

**Weight factor.** As stated in the main paper, the final optimization process of our method to model the scene for

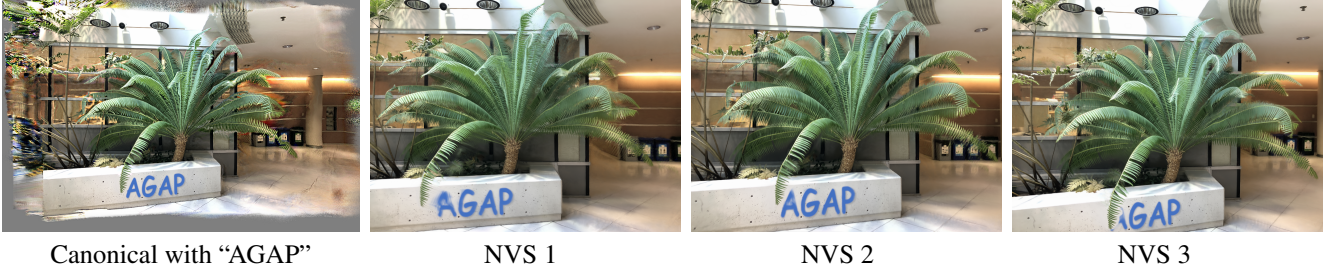

Figure S1. Limitation of texture editing on occluded regions.

efficient editing can be formulated as follows:

$$\phi_G^*, \phi_I^*, \phi_P^* = \arg \min_{\phi_G, \phi_I, \phi_P} \mathcal{L}_{color} + \mathcal{L}_{uv} + \mathcal{L}_{tv}, \quad (S1)$$

where the second and the third terms are controlled by their corresponding weight factors  $\lambda_{uv}$  and  $\lambda_{tv}$ , respectively. To be specific, the weight factor  $\lambda_{uv}$  is set as  $10^{-5}$  for forward-facing scene and larger value of  $10^{-1}$  or  $10^{-2}$  for panorama and inward-facing  $360^\circ$  scenes; the weight factor  $\lambda_{tv}$  is set as  $10^{-4}$  for panorama scene and  $10^{-5}$  for other scenes. Note that for panorama and inward-facing  $360^\circ$  data, the total variation term is disabled after 20000 steps to learn depths in detail.

**Progressive training.** Similar to [1, 8, 12], we apply progressive scaling for our voxel grid  $\phi_G$  and canonical image  $\phi_I$  for a coarse-to-fine learning process. By gradually refining the resolution of both representations, we enable a more detailed and comprehensive learning process.

At specific scaling-up milestone steps, we increase the  $\phi_G$  voxel count by a factor of 2 and the  $\phi_I$  pixel count by a factor of 4. For the forward-facing and object-centric data scenes, the voxel grid  $\phi_G$  is scaled up at  $\{2000, 4000, 6000, 8000\}$  training steps and the canonical image  $\phi_I$  is scaled up at  $\{8000, 16000\}$  training steps. For the panorama data types, the voxel grid  $\phi_G$  is scaled up at  $\{2000, 4000, 6000, 8000, 10000, 12000, 14000, 16000\}$  training steps, and the canonical image  $\phi_I$  is scaled up at  $\{4000, 8000, 12000, 16000\}$  training steps.

**Size of voxel grid  $\phi_G$  and canonical image  $\phi_I$ .** After the progressive scaling up, The final resolution of the voxel grid  $\phi_G$  is set as  $384 \times 384 \times 256$  for forward-facing scenes and  $320 \times 320 \times 320$  for other scenes.

For the NDC canonical camera of forward-facing scenes, we set the height  $H_I$  of the learnable explicit canonical image  $\phi_I$  as 768, and the canonical image width  $W_I$  is adaptively calculated according to the width-height aspect ratio of the training images and the computed bounding box of the scene in NDC space. Denoting the bounding box in NDC space as  $(x'_{min}, x'_{max})$  in  $x'$  dimension,  $(y'_{min}, y'_{max})$  in  $y'$  dimension, and  $(z'_{min}, z'_{max}) = (-1, 1)$  in  $z'$  dimension and the aspect ratio as  $r_I$ , we can then

calculate the canonical image width as:

$$W_I = H_I \times r_I \times \frac{x'_{max} - x'_{min}}{y'_{max} - y'_{min}}. \quad (S2)$$

For the canonical camera of panorama scenes, the canonical image height is set to be 768 and the width  $W_I$  is set to be  $2 \times 768 = 1536$  according to the definition of Equirectangular projection.

For the canonical camera of object-centric scenes, the canonical image width and height are adaptive, where the canonical image width-height aspect ratio  $r_I = \frac{W_I}{H_I}$  is calculated according to the uv range:

$$r_I = \frac{u_{max} - u_{min}}{v_{max} - v_{min}}, \quad (S3)$$

where  $u \in [-\pi, \pi]$  and  $v \in [-\frac{\pi}{2}, \frac{\pi}{2}]$ . The shorter dimension, whether width or height, is set to 768.

**Annealed positional and hash encoding.** The projection offset employs Fourier positional encoding [13] or multi-resolution hash encoding [9] to capture high-frequency information. Given an input vector  $\mathbf{x} \in \mathbb{R}^3$ , the corresponding encoding can be defined as follows:

- The positional encoding is defined as  $\gamma_{pe}(\cdot) : \mathbb{R}^3 \rightarrow \mathbb{R}^{3 \times (1+2K)}$  to encode 3-dimensional vector  $\mathbf{x}$  up to  $K$  frequencies as  $\gamma_{pe}(\mathbf{x}) = [\mathbf{x}, F_1(\mathbf{x}), \dots, F_K(\mathbf{x})]$ . For the  $k$ -th frequency of positional encoding, we have the encoding function  $F_k(\mathbf{x}) = [\sin(2^k \mathbf{x}), \cos(2^k \mathbf{x})] \in \mathbb{R}^{2 \times 3}$ .
- The hash encoding is defined as  $\gamma_h(\cdot) : \mathbb{R}^3 \rightarrow \mathbb{R}^{3+DK}$  to encode the vector  $\mathbf{x}$  by a  $K$ -resolution hash grid with  $D$ -dimensional feature per layer as  $\gamma_h(\mathbf{x}) = [\mathbf{x}, H_1(\mathbf{x}), \dots, H_K(\mathbf{x})]$ . For the  $k$ -th resolution hash grid with  $D$ -dimensional feature at each layer, we have the encoding function  $H_k(\mathbf{x}) \in \mathbb{R}^D$ .

Motivated by Nerfies [10], the positional or hash encoding can incorporate an optional annealing learning strategy. Specifically, we introduce a weight factor  $w_k^n = \frac{1}{2}(1 - \cos(\alpha_k^n \pi))$  for some encoded frequency  $F_k^n$  or  $H_k^n$  at some training step  $n$ , such that we have  $F_k^n(\cdot) = w_k^n F_k(\cdot)$  or  $H_k^n(\cdot) = w_k^n H_k(\cdot)$  and

$$\alpha_k^n = \min(\max(\frac{n - N_s}{N_e - N_s} K - k, 0.0), 1.0), \quad (S4)$$

where  $N_s$  and  $N_e$  denote the start and end steps for anneal encoding, respectively. The strategy aims to facilitate the learning of low-frequency details and gradually incorporate high-frequency bands as the training progresses.

For all the experiments, the encoding  $\gamma_d$  of direction  $\mathbf{d}$  specifically employs positional encoding  $\gamma_{pe}$ , where we set  $K = 4$  with the optional annealing learning strategy off. Concerning the encoding  $\gamma_p$  of position  $\mathbf{p}_{xyz}$ , we choose to use positional encoding  $\gamma_{pe}$  for PE models and hash encoding  $\gamma_h$  for hash models, where we set  $K = 8$  with the annealed learning starting at training step  $N_s = 4000$  and ending at  $N_e = 8000$  for PE models, and we set  $D = 2$  and  $K = 16$  without the optional annealed learning strategy for hash models.

## References

- [1] Barron, J.T., Mildenhall, B., Verbin, D., Srinivasan, P.P., Hedman, P.: Mip-nerf 360: Unbounded anti-aliased neural radiance fields. In: Proceedings of CVPR (2022) [1](#), [2](#)
- [2] Habtegebrial, T., Gava, C.C., Rogge, M., Stricker, D., Jampani, V.: SOMSI: spherical novel view synthesis with soft occlusion multi-sphere images. In: Proceedings of CVPR (2022)
- [3] Haque, A., Tancik, M., Efros, A.A., Holynski, A., Kanazawa, A.: Instruct-nerf2nerf: Editing 3d scenes with instructions. In: Proceedings of ICCV (2023) [1](#)
- [4] Jensen, R.R., Dahl, A.L., Vogiatzis, G., Tola, E., Aanæs, H.: Large scale multi-view stereopsis evaluation. In: Proceedings of CVPR. pp. 406–413 (2014) [1](#)
- [5] Kingma, D.P., Ba, J.: Adam: A method for stochastic optimization. In: Proceedings of ICLR (2015) [1](#)
- [6] Ma, L., Li, X., Liao, J., Wang, X., Zhang, Q., Wang, J., Sander, P.V.: Neural parameterization for dynamic human head editing. ACM Trans. Graph. **41**(6), 236:1–236:15 (2022) [1](#)
- [7] Mildenhall, B., Srinivasan, P.P., Cayon, R.O., Kalantari, N.K., Ramamoorthi, R., Ng, R., Kar, A.: Local light field fusion: practical view synthesis with prescriptive sampling guidelines. TOG **38**(4), 29:1–29:14 (2019) [1](#)
- [8] Mildenhall, B., Srinivasan, P.P., Tancik, M., Barron, J.T., Ramamoorthi, R., Ng, R.: Nerf: Representing scenes as neural radiance fields for view synthesis. In: Proceedings of ECCV. pp. 405–421 (2020) [1](#), [2](#)
- [9] Müller, T., Evans, A., Schied, C., Keller, A.: Instant neural graphics primitives with a multiresolution hash encoding. TOG **41**(4), 102:1–102:15 (2022) [2](#)
- [10] Park, K., Sinha, U., Barron, J.T., Bouaziz, S., Goldman, D.B., Seitz, S.M., Martin-Brualla, R.: Nerfies: Deformable neural radiance fields. In: Proceedings of ICCV. pp. 5845–5854 (2021) [2](#)
- [11] Straub, J., Whelan, T., Ma, L., Chen, Y., Wijmans, E., Green, S., Engel, J.J., Mur-Artal, R., Ren, C.Y., Verma, S., Clarkson, A., Yan, M., Budge, B., Yan, Y., Pan, X., Yon, J., Zou, Y., Leon, K., Carter, N., Briales, J., Gillingham, T., Mueggler, E., Pesqueira, L., Savva, M., Batra, D., Strasdat, H.M., Nardi, R.D., Goesele, M., Lovegrove, S., Newcombe, R.A.: The replica dataset: A digital replica of indoor spaces. CoRR **abs/1906.05797** (2019) [1](#)
- [12] Sun, C., Sun, M., Chen, H.: Direct voxel grid optimization: Super-fast convergence for radiance fields reconstruction. In: Proceedings of CVPR. pp. 5449–5459 (2022) [2](#)
- [13] Vaswani, A., Shazeer, N., Parmar, N., Uszkoreit, J., Jones, L., Gomez, A.N., Kaiser, L., Polosukhin, I.: Attention is all you need. In: Advances in NeurIPS. pp. 5998–6008 (2017) [2](#)
